# Supplementary material
Source: PubMed Central journal article supplement (PMC6479035)
Supplement: IAI.00119-19-s0001.pdf [file IAI.00119-19-s0001.pdf]

1 **Supporting Information**

2 **ARTICLE TITLE**

3 **An alternative enzyme protection assay to overcome the drawbacks of gentamicin**  
4 **protection assay for measuring entry and intracellular survival of Staphylococci**

5

6

7 **RUNNING TITLE**

8 Precise quantification of intracellular bacteria

9

10 **AUTHORS**

11 Jin-Hahn Kim<sup>1,§</sup>, Akhilesh Kumar Chaurasia<sup>1,§</sup>, Nayab Batool<sup>1</sup>, Kwan Soo Ko<sup>1</sup>, and Kyeong Kyu  
12 Kim<sup>1,2\*</sup>

13 <sup>1</sup>Department of Molecular Cell Biology, Institute for Antimicrobial Resistance Research and  
14 Therapeutics, Sungkyunkwan University School of Medicine, Suwon 16419, Korea

15 <sup>2</sup>Samsung Biomedical Research Institute, Samsung Advanced Institute for Health Sciences and  
16 Technology, Samsung Medical Center, Sungkyunkwan University School of Medicine, Seoul  
17 06351, Korea

18

19

20 <sup>§</sup>These authors contributed equally to this work

21 <sup>\*</sup>To whom all correspondence should be addressed:

22 Tel: 82-31-299-6136

23 Fax: 82-31-299-6159

24 E-mail: [kyeongkyu@skku.edu](mailto:kyeongkyu@skku.edu)

25

26 **Contents:**

27 **A. Supplementary figures**

28

- 29 **1. Supplementary Figure S1.** Qualitative assessment of gentamicin and lysostaphin-mediated  
30 killing efficiency for *S. aureus*
- 31 **2. Supplementary Figure S2.** Killing efficiency of lysostaphin for *S. aureus* at high-density
- 32 **3. Supplementary Figure S3.** Confocal image analysis of gentamicin protection assay (GPA)  
33 to evaluate the extracellular and intracellular localization of *S. aureus* in mouse macrophage,  
34 RAW264.7 cells
- 35 **4. Supplementary Figure S4.** Confocal image analysis of enzyme protection assay (EPA) to  
36 envisage the extracellular and intracellular localization of *S. aureus* in mouse macrophage,  
37 RAW264.7 cells
- 38 **5. Supplementary Figure S5.** Qualitative confocal image analysis to confirm the intracellular  
39 killing of *S. aureus* during GPA both in mouse macrophage (RAW264.7) and human  
40 embryonic kidney (HEK293) cell lines
- 41 **6. Supplementary Figure S6.** Conjugation of gentamicin (GT) to Texas Red-X succinimidyl  
42 ester (TR) to visualize the internalization of gentamicin-TR into host cells
- 43 **7. Supplementary Figure S7.** Visualization of gentamicin-TR internalization into the  
44 HEK293 cells
- 45 **8. Supplementary Figure S8.** Bactericidal activity of the gentamicin at the concentration  
46 equivalent to the host-cell internalized gentamicin
- 47 **9. Supplementary Figure S9.** Assessment of the internalization of lysostaphin into host cells
- 48 **10. Supplementary Figure S10.** Effect of host cell-internalized lysostaphin on *S. aureus*
- 49 **11. Supplementary Figure S11.** Comparative assessment of the invasion potentials of *S. aureus*  
50 and its isogenic mutants lacking the fibronectin binding protein FnBPA or FnBPB using  
51 GPA and EPA in phagocytic RAW264.7 cells
- 52 **12. Supplementary Figure S12.** Tunability of lysostaphin activity
- 53 **13. Supplementary Figure S13.** Snapshot of video V1 showing gentamicin-mediated

54 extracellular killing of *S. aureus* infected into RAW264.7 cells

55 **14. Supplementary Figure S14.** Snapshot of video V2 showing lysostaphin-mediated killing  
56 of extracellular *S. aureus* infected into RAW264.7 cells

57

58 **B. Supplementary videos**

59

60 **1. Supplementary Video V1.** Visualization of the gentamicin-mediated killing of extracellular  
61 and host cell surface-attached *S. aureus* for 1 h after 30-min invasion of *S. aureus* and  
62 phagocytosis by host cells

63 **2. Supplementary Video V2.** Visualization of the lysostaphin-mediated instantaneous killing  
64 of extracellular and host cell surface-bound *S. aureus*

65 **C. References**

66

67

68

69 **A. Supplementary Figures**

70 **FIG S1**

71 **A**

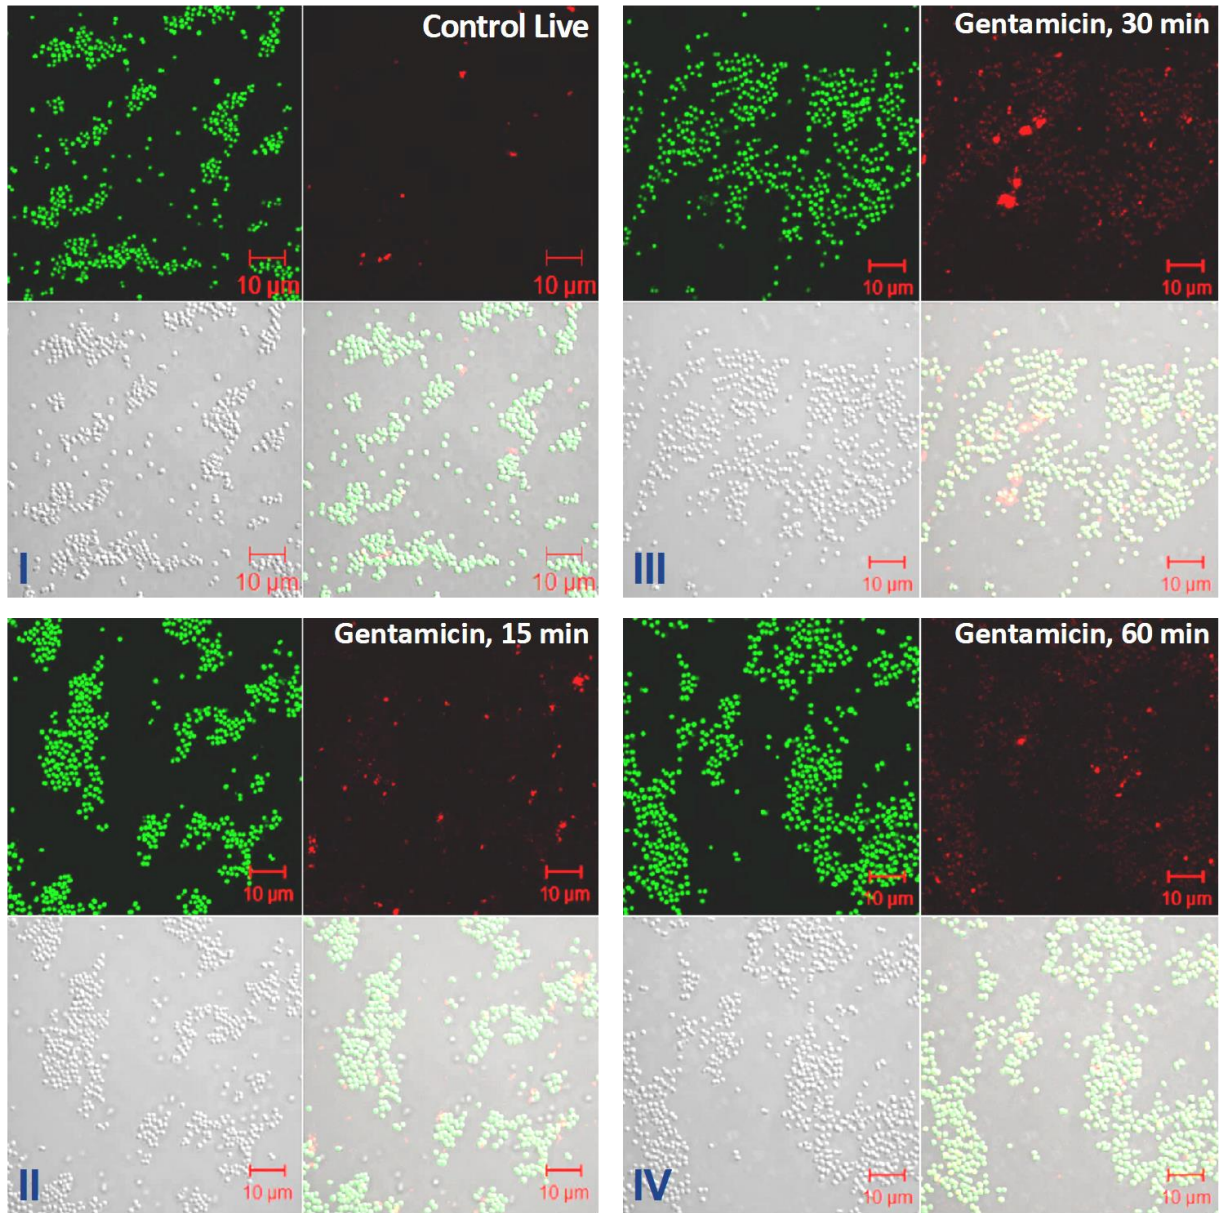

72

73

74

75

76

77

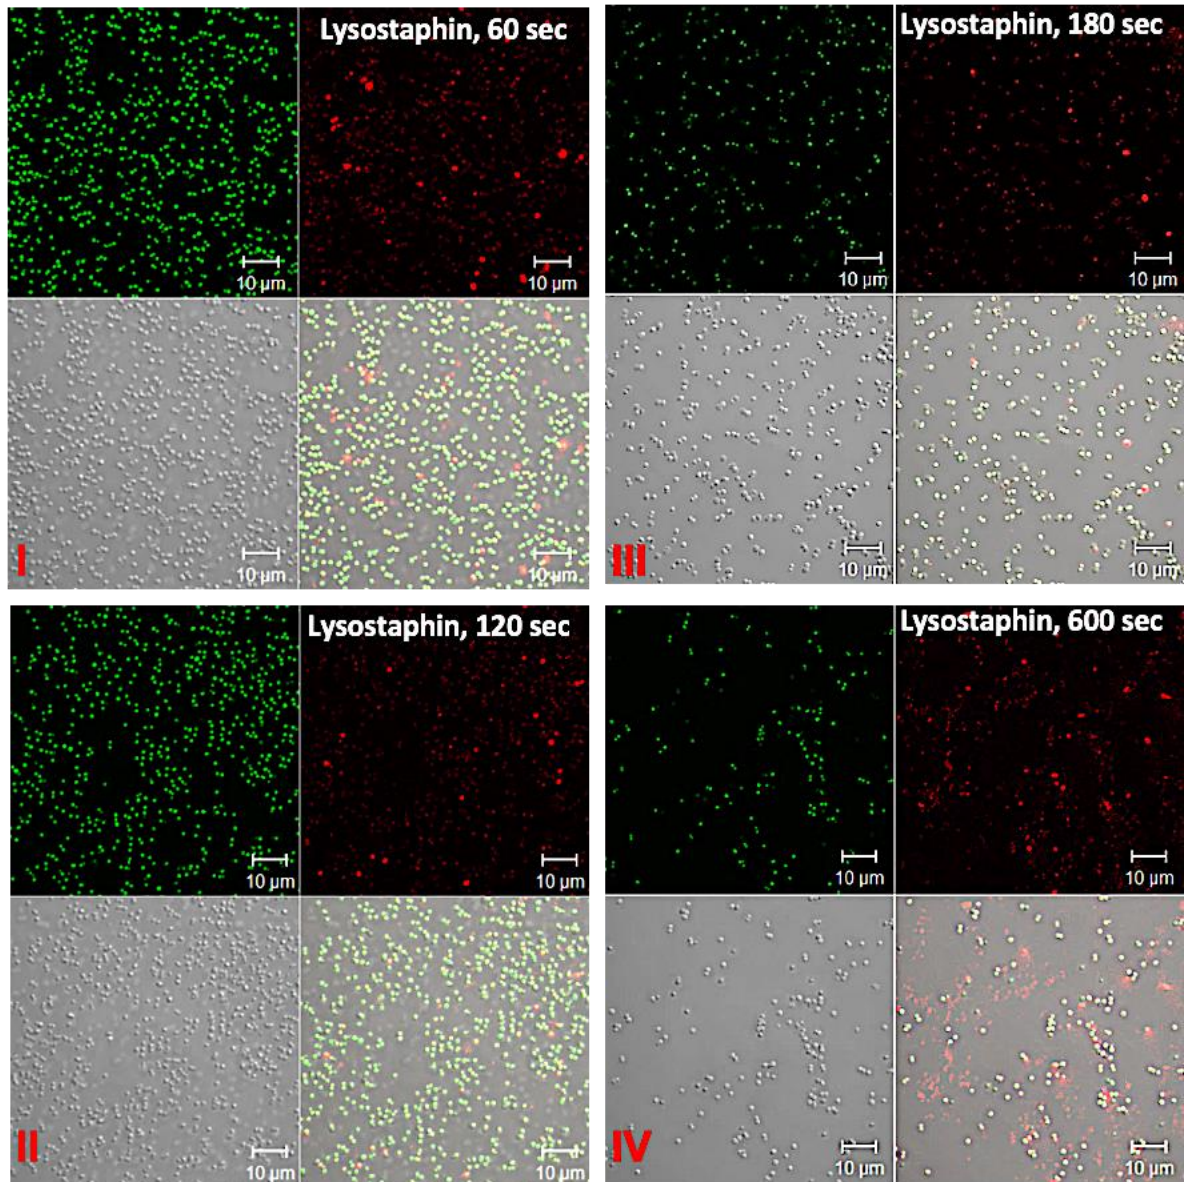

79

80 FIG S1 Qualitative assessment of gentamicin and lysostaphin-mediated killing efficiency for *S. aureus*.

81 (A) The gentamicin-mediated killing for *S. aureus* (400  $\mu\text{g/ml}$  or 840  $\mu\text{M}$  for 1 h) investigated by confocal

82 image. Confocal image (I) indicates the live cells without any treatment, while images (II-IV) depict the

83 gentamicin-mediated killing efficiency for *S. aureus* at various time points (II) 15 min, (III) 30 min and

84 (IV) 60 min. (B) The lysostaphin-mediated killing for *S. aureus* (2U or 17.6 nM for 600 sec) investigated

85 by confocal image. Lysostaphin was treated for (I) 60, (II) 120, (III) 180, and (IV) 600 sec. Bacteria were

86 grown in DMEM media devoid of FBS at 37°C in 5% CO<sub>2</sub> incubator. The BacLight bacterial viability kit

87 (L7007 LIVE/DEAD BacLight™) was used for the qualitative assessment of dead bacteria by confocal

88 imaging. The kit solution contains two nucleic acid fluorescent stains, SYTO9 (green fluorescence) and  
89 propidium iodide (PI, red fluorescence). Each confocal microphotograph (Fig S1A & Fig S1B) shows four  
90 panels, wherein the first shows green (SYTO9 fluorescence); the second red (PI fluorescence); the third  
91 bright-field; and the fourth the merged image of the three panels described above. Since SYTO9 is  
92 permeable to all (live and dead) bacterial cells, SYTO9 stained all bacterial cells in green fluorescence,  
93 providing the total number of bacterial counts. In contrast, propidium iodide can enter only dead bacteria  
94 with compromised/damaged membranes. Therefore, the dead bacteria with membrane damage displayed  
95 the red or orange fluorescence, the green and red fluorescence signals being mixed. Most of the *S. aureus*  
96 cells were damaged due to extremely high killing activity of lysostaphin. It is noteworthy that the amount  
97 of PI entered in the case of gentamicin mediation is lower than the case with lysostaphin mediated killing,  
98 because the killing mechanism of gentamicin is not directly through membrane damage.

99

100

101

102

103

104

105

106

107

108

109

110

111

112

113

114

115



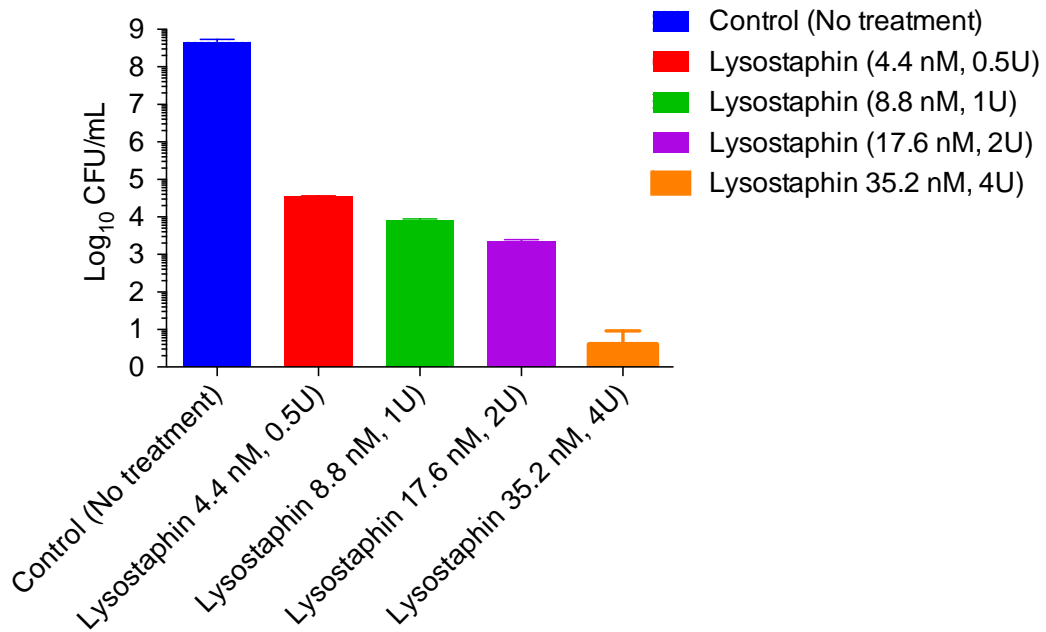

180 seconds incubation, 10<sup>9</sup> Cells of *S. aureus* USA300

117  
 118 FIG S2 Killing efficiency of lysostaphin for the high-density *S. aureus*. Varying concentrations of  
 119 lysostaphin (4.4 nM to 35.2 nM) were used to test the killing efficiency of lysostaphin for the high-density  
 120 *S. aureus* at the fixed incubation time of 180 sec. Log phage grown *S. aureus* cells were harvested by  
 121 centrifugation at 4000 rpm (3220 ×g) for 10 min at 4°C and washed once with phosphate buffer saline  
 122 (PBS, pH 7.4). Then, *S. aureus* cell-suspension (OD<sub>600</sub> = 1, 6 ml) was made in DMEM media devoid of  
 123 FBS, and the experiment was set-up using 1 ml for each of the treatments, as shown in the figure label.  
 124 The high-density *S. aureus* cells (~ 10<sup>9</sup>), which are more likely to occur under both *in vitro* conditions at  
 125 high multiplicity of infection (*moi*) experiment and under circumstances of severe infection, were killed  
 126 at 4 U (35.2 nM) lysostaphin within 180 sec.

127

128

129

130

131

132

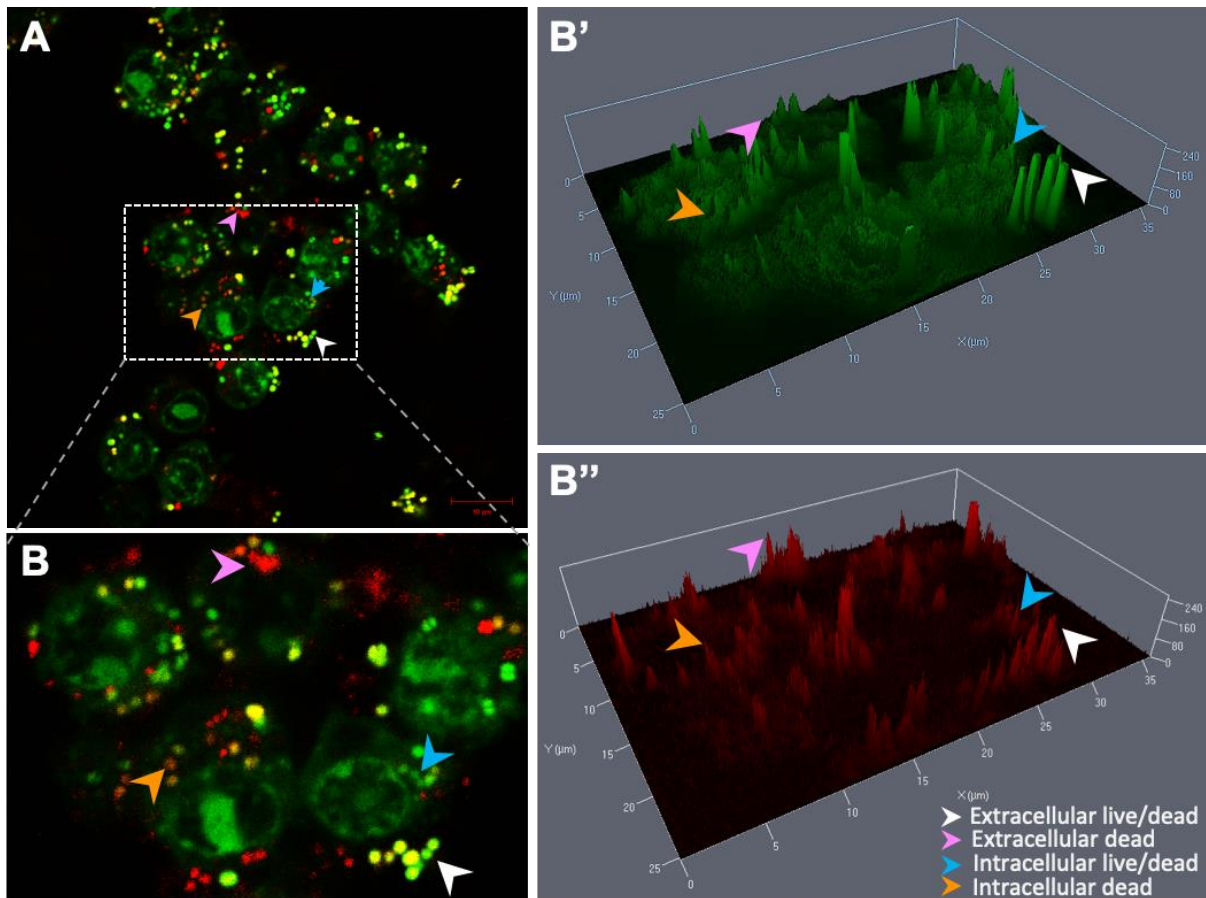

134  
 135 FIG S3 Confocal image analysis of gentamicin protection assay (GPA) to evaluate the extracellular and  
 136 intracellular localization of *S. aureus* in mouse macrophage, RAW264.7 cells. (A) The BacLight viability-  
 137 stained *S. aureus* was infected into RAW264.7 cells for 30 min, followed by gentamicin treatment (840  
 138 μM for 2h) during GPA. (B) Cropped region of Image A (B'-B''). Image B was analyzed using Zen  
 139 software (ZEISS) to measure the fluorescence intensity of SYTO9 (green dot, B'), and PI (red dot, B'') to  
 140 evaluate the localization of *S. aureus* cells. The red dots with fluorescence intensity around  $210 \pm 20$  au are  
 141 considered to be dead *S. aureus* cells present in extracellular space or on the host cell-surface, and those  
 142 around  $\sim 120 \pm 20$  au are expected to be the dead cells inside the host cells. Various color arrowheads depict  
 143 the position and state of *S. aureus* cells. The white arrowhead indicates extracellular bacteria, but  
 144 arrowhead in pink indicates the dead bacteria present in the host cell-surface and extracellular milieu. The  
 145 sky blue and orange arrowheads show intracellular live/dead and intracellular dead bacteria, respectively.  
 146 A significant number of intracellular dead *S. aureus* cells were detected in the representative image of GPA.



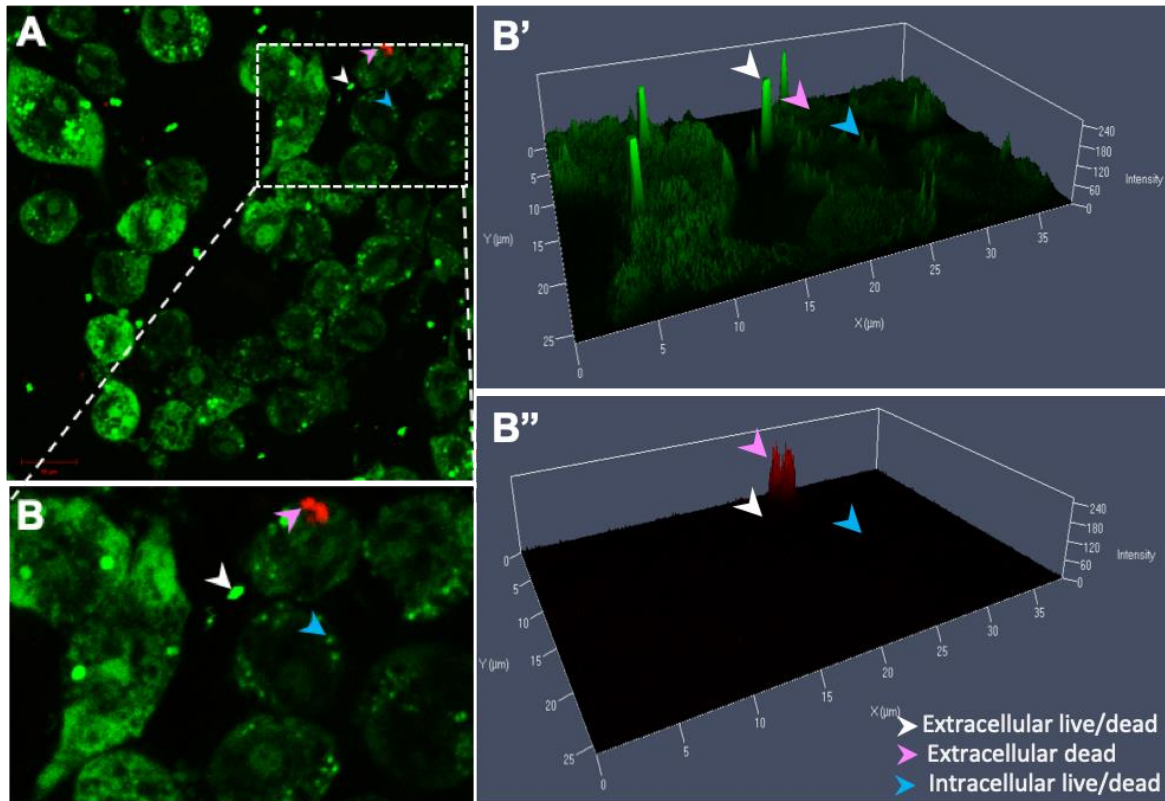

148

149 FIG S4 Analysis of enzyme protection assay (EPA) confocal image to envisage the extracellular and

150 intracellular localization of *S. aureus* in mouse macrophage, RAW264.7 cells. (A) The BacLight viability-

151 stained *S. aureus* was infected into RAW264.7 cells for 30 min, followed by lysostaphin treatment (2 U,

152 for 10 min) during EPA. (B) Cropped region of Image A (B'-B''). Image B was analyzed in the same way

153 as Fig S3B. The color arrowhead depiction is the same as indicated in Fig S3. It is noteworthy that no

154 intracellular dead *S. aureus* cells were detected in the representative image of EPA. The image analysis of

155 intracellular dead bacteria in Fig S3B'' and S4B'', the proportion of dead intracellular *S. aureus* in GPA

156 versus EPA is phenotypically evident. However, based on the counting of a 2D image (Fig. S4B''), no

157 intracellular dead *S. aureus* (PI-stained red dot) was found during EPA. Therefore, the counting of dead

158 intracellular bacteria based on image analysis is practically not possible during EPA. Nonetheless, the

159 precise CFU counting method yielded the difference between two methods (GPA versus EPA) in the

160 recovery of intracellular living *S. aureus* was about five times (Fig. 1D), and the CFU count varies within

161 one  $\log_{10}$ CFU value depending upon the time of infection (Fig. 5C).

162

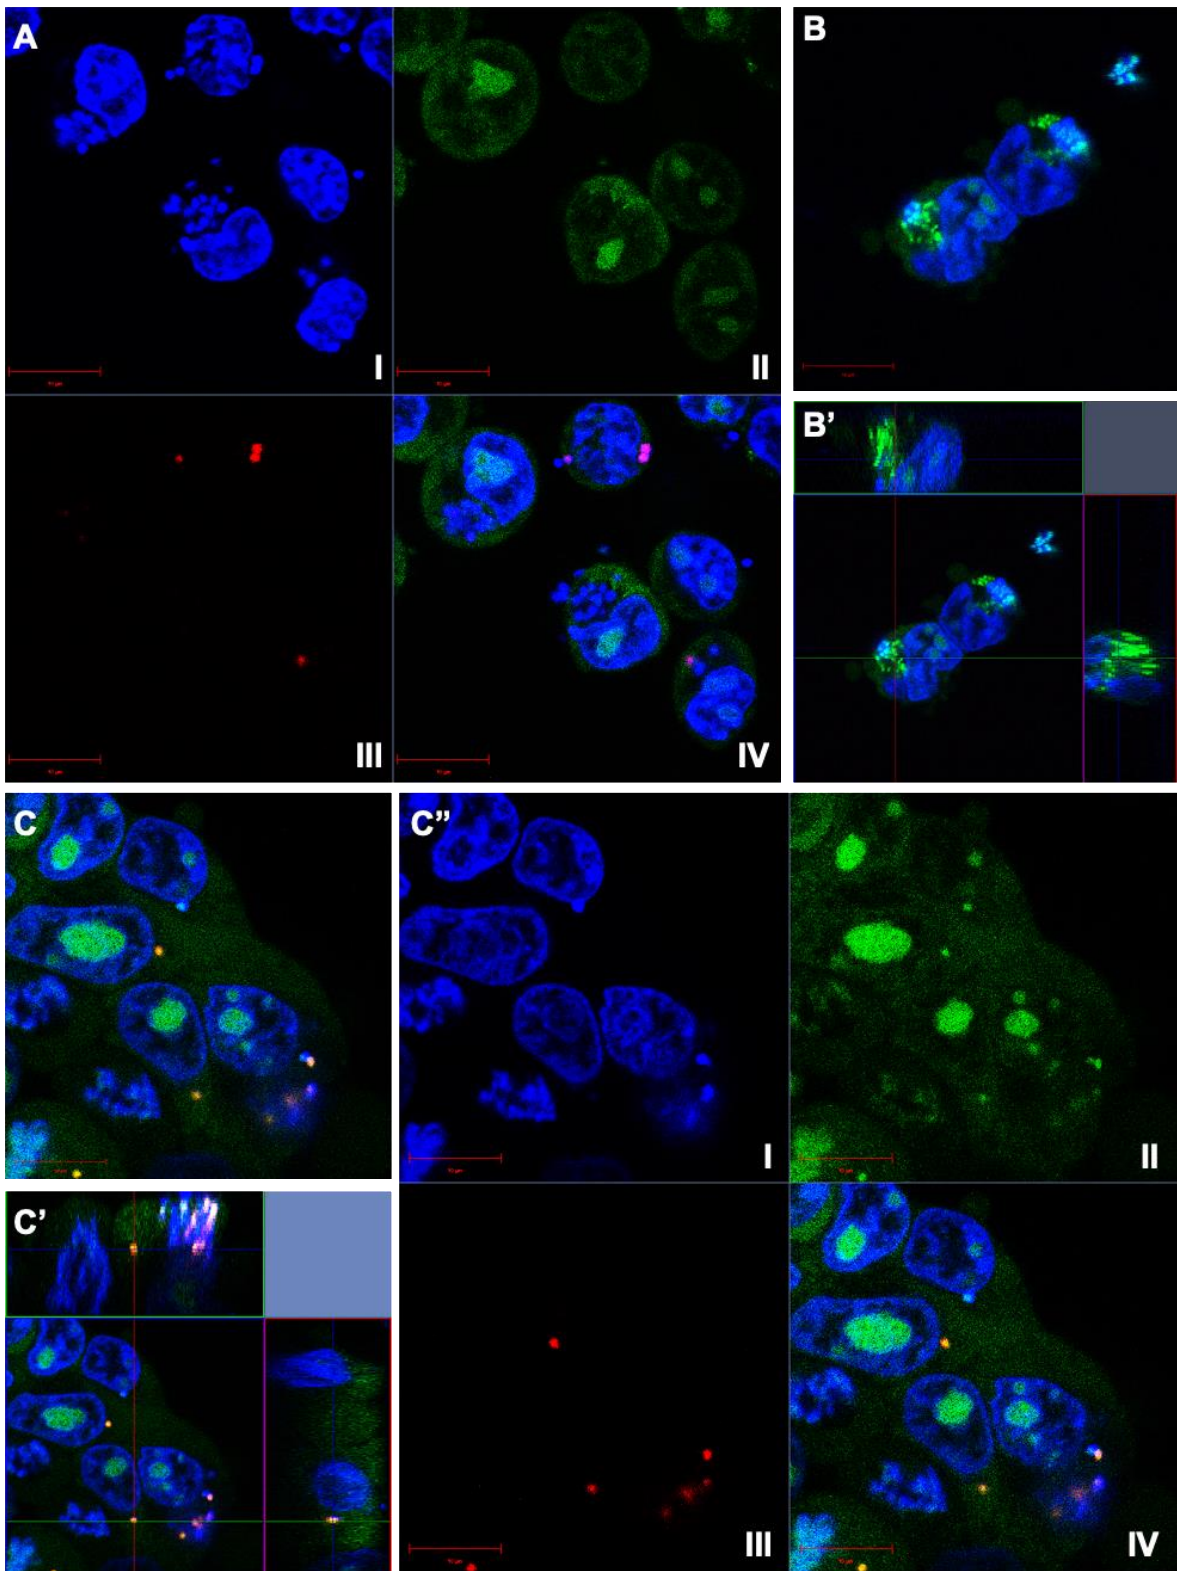

164  
 165 FIG S5 Qualitative confocal image analysis to confirm the intracellular killing of *S. aureus* during GPA  
 166 both in mouse macrophage (RAW264.7) and human embryonic kidney (HEK293) cell lines. (A) Confocal  
 167 images showing the split channel of Fig 2C, in which RAW264.7 cells infected with *S. aureus* were

168 subjected to GPA. Four panels show (I) the nucleus of RAW264.7 stained blue using Hoechst 33258 for  
169 live cell imaging; (II) the SYTO9 channel showing intracellular *S. aureus* and slightly greenish cellular  
170 boundary of RAW264.7, most likely due to the diffusion of SYTO9 from the LIVE/DEAD BacLight  
171 labeled *S. aureus* cells used for infection; (III) the PI-stained dead intracellular *S. aureus*; and (IV) the  
172 merged image of the aforesaid channels (I)-(III). (B-B') Live cell confocal images of the *S. aureus*-infected  
173 HEK293 cells without GPA. The center stack of Z-stack images (B) and their ortho-images (B') show the  
174 presence of intracellular *S. aureus* in HEK293 host cells. (C-C'') Confocal images showing intracellular  
175 killing of *S. aureus* in nonphagocytic host HEK293 cells during GPA. (C) Two-dimensional image of the  
176 center stack of the Z-stack image shows red fluorescent *S. aureus* cells in host cells. (C') The ortho-image  
177 analysis of (C) reveals the dead intracellular *S. aureus* in HEK293. (C'') The split channel images of the  
178 merged image (C') depict, (I) Hoechst 33258 stained nucleus of HEK293 cells, (II) the SYTO9 stained  
179 intracellular *S. aureus* and slightly greenish cellular boundary of HEK293 cells, (III) the PI-stained dead  
180 intracellular *S. aureus*, and (IV) the merged image of the aforesaid channels (I)-(III). The Z-stack live cell  
181 images of phagocytic RAW264.7 and nonphagocytic HEK293 with *S. aureus* infection treated with GPA  
182 showed that non-specific killing of intracellular *S. aureus* occurs in both host cells.

183  
184  
185  
186  
187  
188  
189  
190  
191  
192  
193  
194  
195

**A**

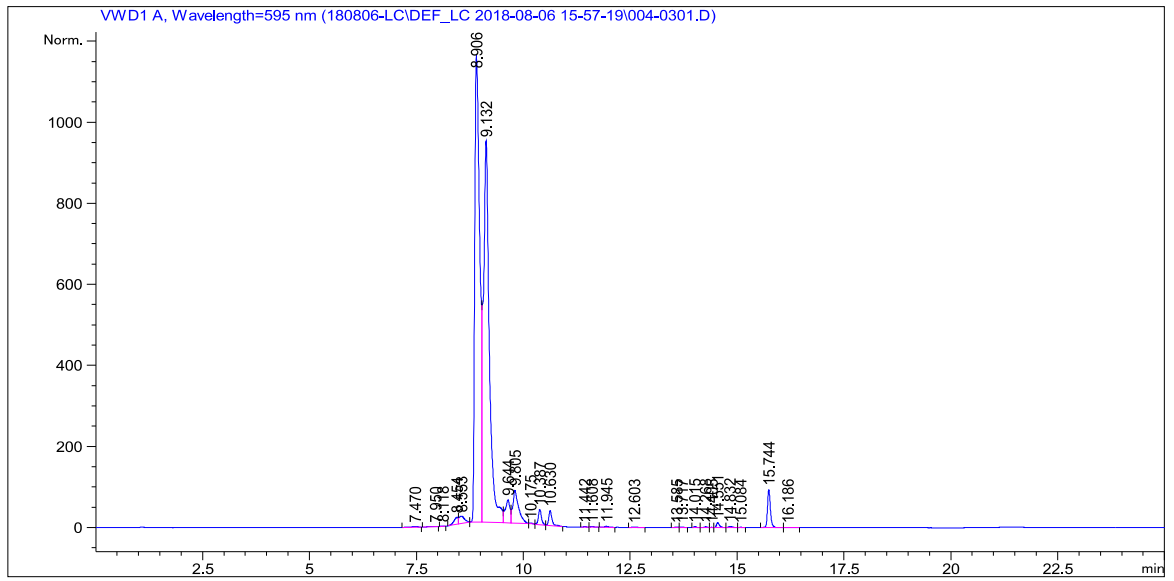

197

**B**

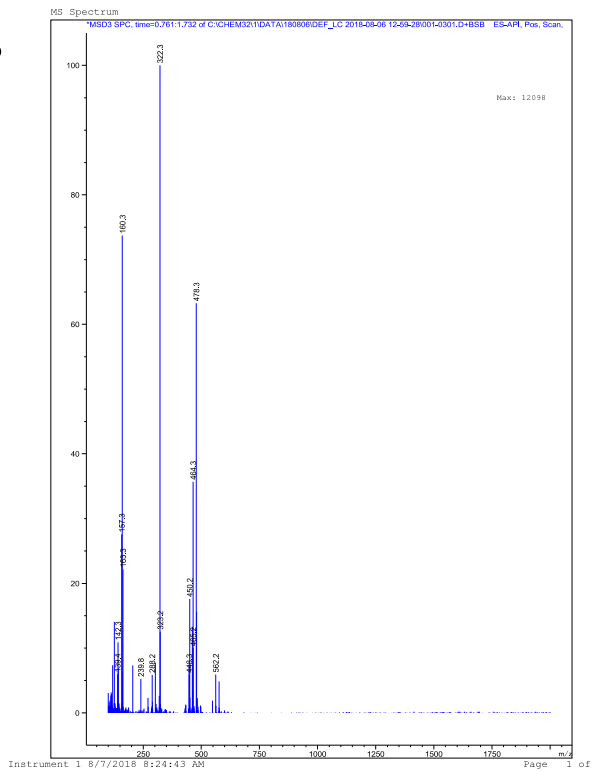

**C**

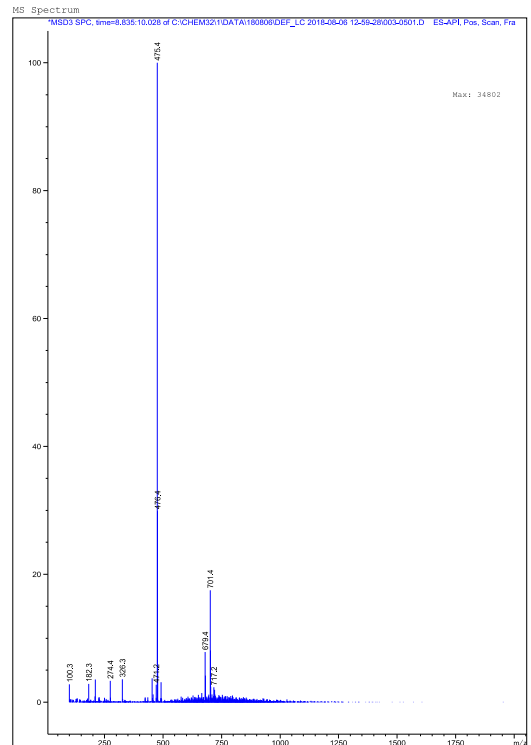

198

199 FIG S6 Conjugation of gentamicin (GT) to Texas Red-X succinimidyl ester (TR) to visualize the  
 200 internalization of gentamicin-TR (GTTR) into host cells. (A) Liquid chromatographic separation of  
 201 conjugated product, GTTR. (B) Mass analysis of GT. (C) Mass analysis of GTTR. The method of LC/MS  
 202 for the separation of GTTR and mass analysis is performed as described earlier (1).

203

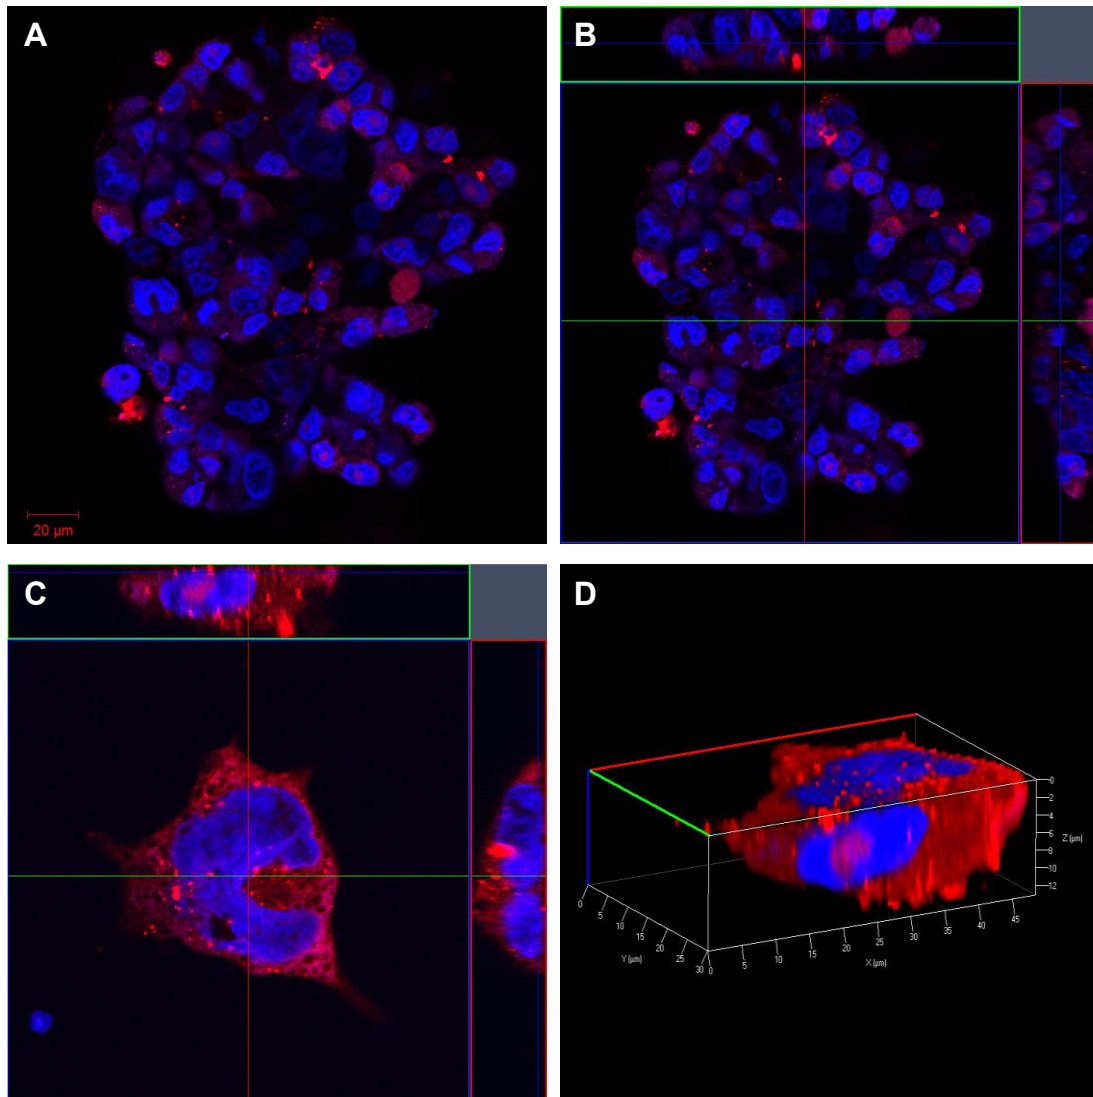

205

206 FIG S7 Visualization of gentamicin-TR (GTTR) internalization into the HEK293 cells. GTTR at 50  $\mu\text{g/ml}$

207 was incubated with HEK293 cells for 1 h. The excess GTTR was removed and washed gently thrice with

208 PBS (pH 7.4), followed by an addition of 2  $\mu\text{l}$  of Hoechst 33258 (10 mg/ml stock) in the confocal disc,

209 which contained 1 ml media to stain the nucleus for 10 min at 37°C in CO<sub>2</sub> incubator. After nuclear staining,

210 the host cells were washed once with PBS and fixed with freshly prepared and filtered (0.22  $\mu$ ) 4%

211 paraformaldehyde. The fixed cells were washed thrice with PBS. After washing, the cells in confocal disc

212 were overlaid with 300  $\mu\text{l}$  of PBS. (A) 2D image of HEK293 cells showing GTTR red fluorescence. (B)

213 Ortho-image of the center stack of Z-stack images of HEK293 cells showing the presence of GTTR red

214 fluorescence in the cytosol. (C) A single enlarged cell was imaged in Z-stack. (D) The three-dimensional

215 model of the enlarged HEK293 cell (C) was vertically dissected as shown by a red line to analyze the  
216 internalization of GTTR. The dissected three-dimensional image showed the intracellular red fluorescence  
217 signal of GTTR which confirmed the internalization of gentamicin-TR into the HEK293 cells.

218

219 **FIG S8**

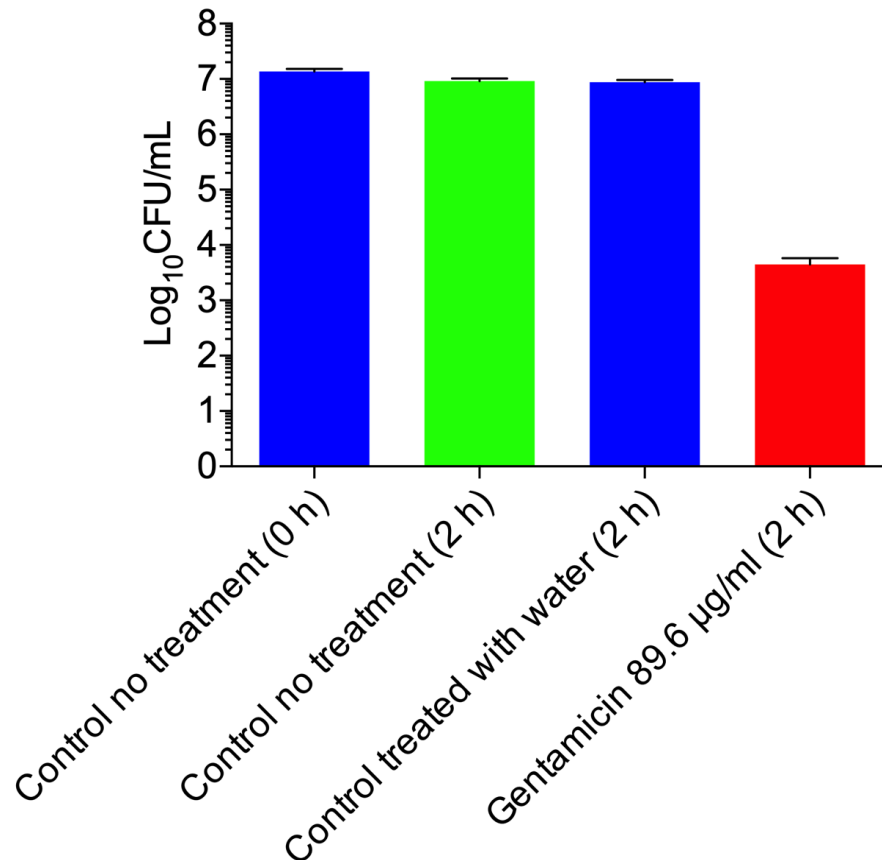

220

221 FIG S8 Bactericidal activity of the gentamicin at the concentration equivalent to the host-cell internalized  
222 gentamicin. The log phase grown *S. aureus* cells (OD<sub>600</sub> equivalent 0.01 or  $\sim 1 \times 10^7$ ) in DMEM media  
223 devoid of FBS, were incubated without or with 89.6 µg/ml of gentamicin for 2h at 37°C in for 2 h under  
224 shaking culture conditions. The control was exposed to the equivalent volume of autoclaved water. The  
225 decrease in  $\sim 3$  log<sub>10</sub>CFU value of *S. aureus* during the gentamicin treatment was observed. This result  
226 signified and established that the 89.6 µg/ml concentration of gentamicin could kill *S. aureus* cells under  
227 *in vitro* conditions, suggesting that the internalized gentamicin can kill *S. aureus* inside the host cells.

228

229



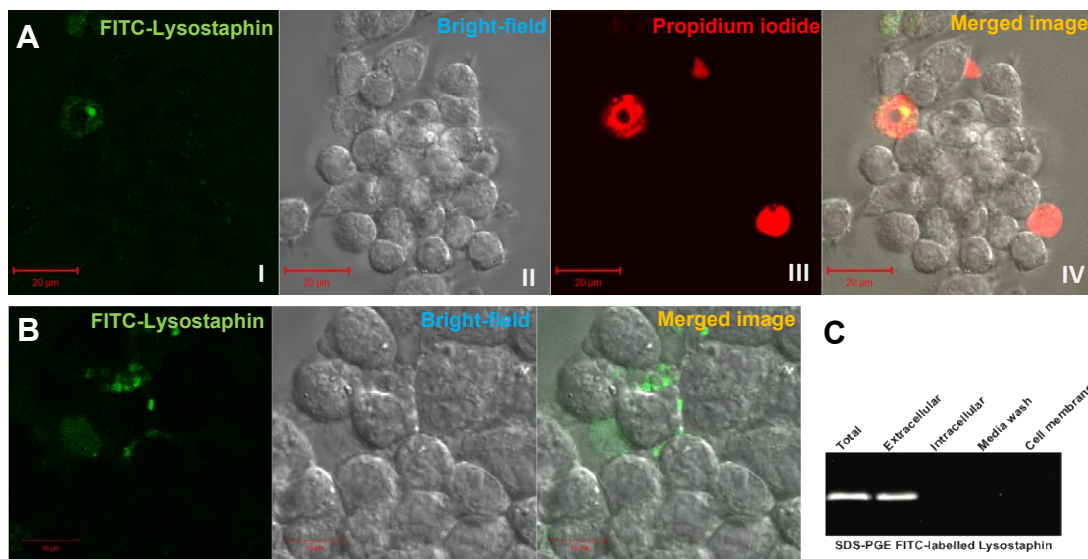

231

232 FIG S9 Assessment of the internalization of lysostaphin into host cells. (A) Live cell imaging of

233 RAW264.7 cells treated with FITC-labeled lysostaphin. RAW264.7 cells were incubated with FITC-

234 lysostaphin for 30 min followed by propidium iodide (PI) staining for the visualization of dead cells. The

235 stained cells were observed using confocal laser scanning microscopy with FITC (I), DIC (II), and PI (III)

236 filters. Panel IV shows the merged image of I-III. The FITC-labeled lysostaphin was found only in dead

237 cells, red-stained by PI, suggesting that lysostaphin is impermeable to live cells. (B) The FITC-lysostaphin

238 was added to RAW264.7 cells for 10 min, and then cells were immediately fixed with 4%

239 paraformaldehyde without washing to stop the endolysosomal-network and its subsequent acidification,

240 which raises a possibility of fluorescence quenching of FITC at acidic pH. The quenching and inability to

241 detect FITC may result in a misinterpretation that lysostaphin could not enter into the host cells. The FITC-

242 lysostaphin was not detected in the cytosolic space in the fixed cell images, but was localized in

243 extracellular space and on cellular boundaries. (C) The FITC-labeled lysostaphin was applied to

244 RAW264.7 host cells for 30 min at 37°C in 5% CO<sub>2</sub> incubator. Each cell lysis was fractionized and

245 analyzed by SDS-PAGE, followed by sensitive fluorescence imaging. FITC-lysostaphin was observed

246 only in the extracellular fraction, suggesting that lysostaphin may have: failed to internalize, or had been

247 internalized at undetectable level, or had been proteolytically degraded by the host cell. Nonetheless, these

248 results eliminate the possibility of any non-specific killing of internalized bacteria by lysostaphin during

249 EPA.

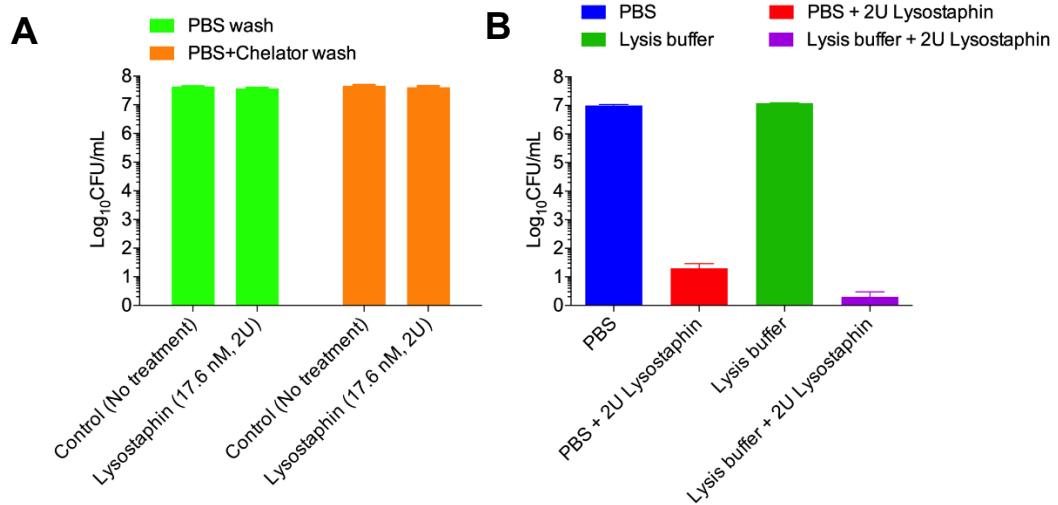

252

253 FIG S10 Effect of host cell-internalized lysostaphin on *S. aureus*. (A) The 80% confluent RAW264.7 cells

254 (72 h) grown in DMEM media with 10% FBS was used to assess the effect of internalized lysostaphin, if

255 any, on *S. aureus*. The utilized DMEM media was replaced with fresh DMEM media devoid of FBS before

256 1 h. The RAW264.7 cells were treated with buffer (control) or 2 U of lysostaphin for 30 min at 37°C with

257 5% CO<sub>2</sub>. Then, used DMEM media was aspirated and the host cells- or microtitre plate surface- adhered

258 lysostaphin was washed with PBS, or PBS with 100 μM 1,10-phenanthroline, followed by two cycles of

259 additional gentle washing with PBS. The control and lysostaphin-treated RAW264.7 cells were collected

260 using rubber scrapper in 1 ml PBS. The cell pellets were lysed in 1.0 ml of the lysis buffer. The 1 ml cell-

261 free extract was used to treat log phase grown *S. aureus* cells for 2 h at 37°C in 5% CO<sub>2</sub> incubator. The *S.*

262 *aureus* cells were diluted in PBS and plated on TSB-agar plate. No significant change in the CFU was

263 observed between the control and lysostaphin treated cell extracts, confirming either that (1) lysostaphin

264 could not enter or (2) was degraded proteolytically upon entry into the host cells. (B) Assessment of killing

265 activity of lysostaphin upon exposure to mammalian cell lysis buffer (0.04% Triton X-100 in autoclaved

266 MilliQ water). Phosphate buffer saline (PBS) and lysis buffer (988 μl) were added with 2U (2 μl) of

267 lysostaphin. The overnight grown *S. aureus* cells were washed with PBS once. An equivalent volume (10

268 μl of the OD<sub>600</sub> = 1) to 10<sup>7</sup> cells was added to PBS and lysis buffer without and with lysostaphin. In fact,

269 the exposure of lysostaphin to the extremely low concentration of Triton X-100 (0.04%) has slightly

270 enhanced the lysostaphin killing activity.

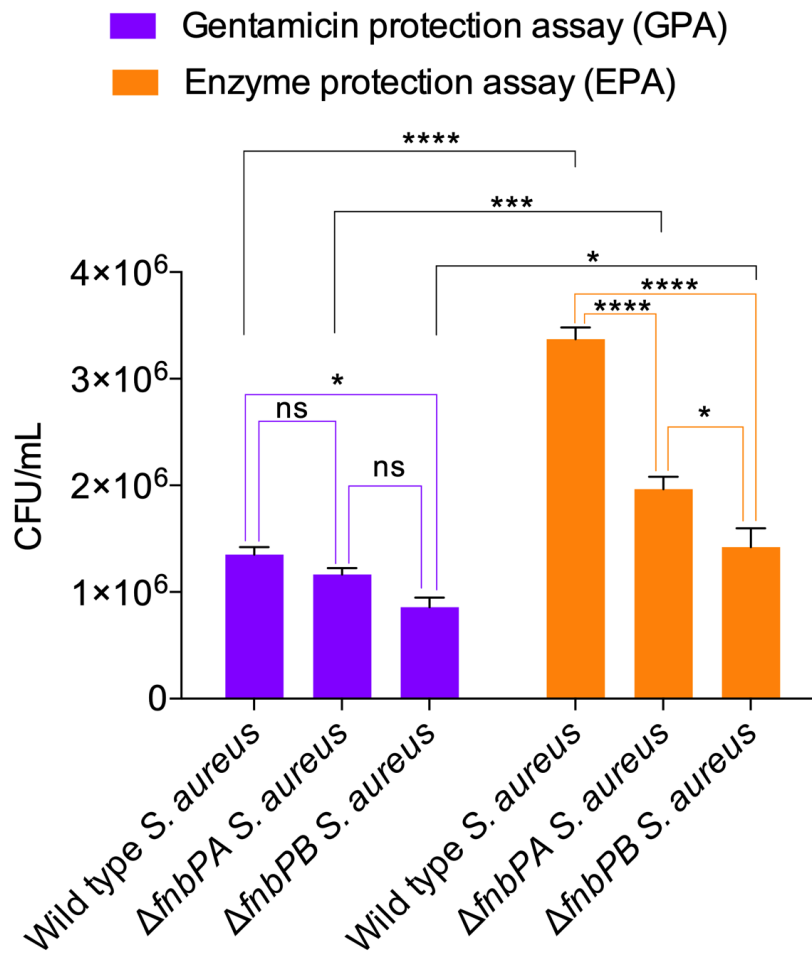

272  
 273 FIG S11 Comparative assessment of the invasion potentials of *S. aureus* and its isogenic mutants lacking  
 274 the fibronectin binding protein FnbPA or FnbPB using GPA and EPA in phagocytic RAW264.7 cells. The  
 275 reduced recovery of colony forming units during GPA indicates that the gentamicin affects the number of  
 276 intracellular-survived *S. aureus* at a greater extent in phagocytic RAW264.7 cells than that of the non-  
 277 phagocytic host, HEK293 cells (Fig 5A). It is known that internalization of bacteria into macrophages is  
 278 not dependent on fibronectin bridging events between FnbPs and integrins. However, with the marginally  
 279 reduced internalization of *fnbPs* mutants compared to wild-type *S. aureus* in mouse macrophage,  
 280 RAW264.7 cells do suggest the possibility of the existence of an unknown mechanism. Internalization  
 281 potentials of *S. aureus* strains in mouse macrophage, RAW264.7 cells were compared by one-way ANOVA  
 282 with Bonferroni's multiple comparisons test. The *p* values are \*, *p* <0.05; \*\*\*, *p* <0.001; and \*\*\*\*, *p*  
 283 <0.0001.

- 1 *SaUSA300* (No treatment)
- 2 *SaUSA300* (EDTA, 50 mM)
- 3 *SaUSA300* (1, 10 Phenanthroline, 100  $\mu$ M)
- 4 *SaUSA300* (Lysostaphin, 8.8 nM, 1U)
- 5 *SaUSA300* (Lysostaphin, 1U+ EDTA, 50 mM)
- 6 *SaUSA300* (Lysostaphin, 1U + 1, 10 Phenanthroline, 100  $\mu$ M)

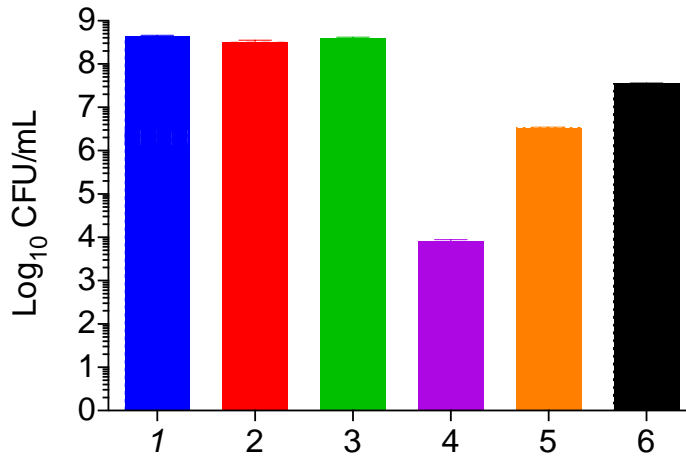

285

286 FIG S12 Tunability of lysostaphin activity. The *S. aureus* cells were harvested, washed with PBS (pH 7.4),

287 and treated as shown in the figure labels (1-6 in X-axis). Both the general metal ion chelator (EDTA) and

288 the zinc-specific chelator (1, 10-phenanthroline) were found to inhibit the activity of lysostaphin. However,

289 1, 10-phenanthroline was found to be more efficient than EDTA, as lysostaphin is a zinc-metallopeptidase

290 (2). It is noteworthy that an assessment of the lysostaphin inhibition by measuring the *S. aureus* cell

291 survival is extremely challenging, since it is hard to detect small changes in the number of *S. aureus* cells

292 using lysostaphin, which shows extremely high and fast *S. aureus* killing activity.

293

294

295

296

297

298

299

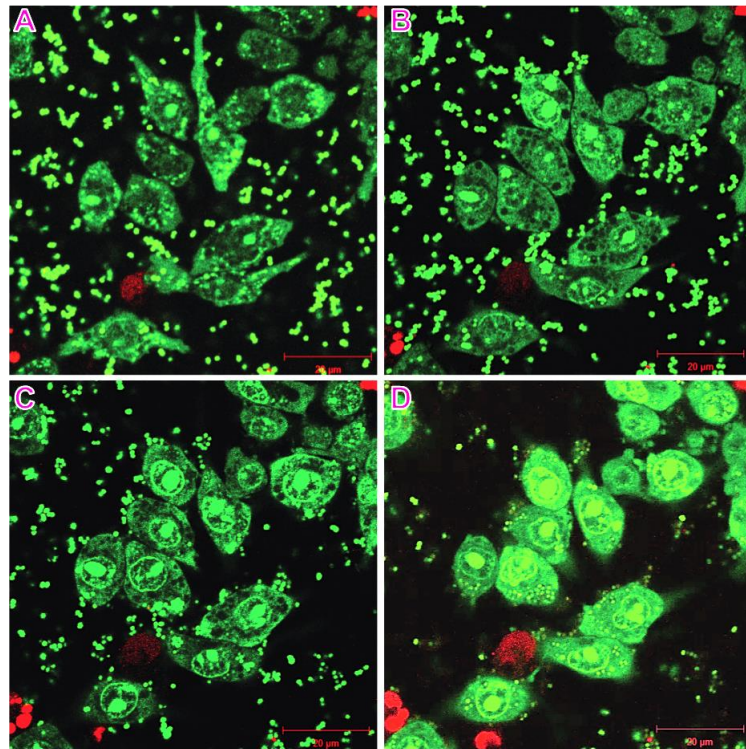

**A** RAW264.7 Cells + *S. aureus* complex 1 min    **B** RAW264.7 Cells + *S. aureus* 15 min    **C** RAW264.7 Cells + *S. aureus* 30 min    **D** RAW264.7 Cells + *S. aureus* 60 min

**Gentamicin killing of extracellular and host cell surface bound *S. aureus***

301

302 FIG S13 Snapshot of video V1 showing gentamicin-mediated killing of extracellular *S. aureus* infected

303 into RAW264.7 cells. The representative images were adapted from the supplementary video V1 at time

304 points (A) 1 min, (B) 15 min, (C) 30 min, and (D) 60 min after treatment with gentamicin. Despite the

305 removal of excess bacteria after 30 min infection followed by washing, there were a significant number of

306 adhered bacteria observed in the confocal disc. It is noteworthy that the internalized bacteria (represented

307 by green) increased with time, suggesting that adhered remaining *S. aureus* continues to get internalized

308 even during gentamicin killing. Therefore, internalized bacteria cannot be accurately measured using the

309 GPA.

310

311

312

313

314



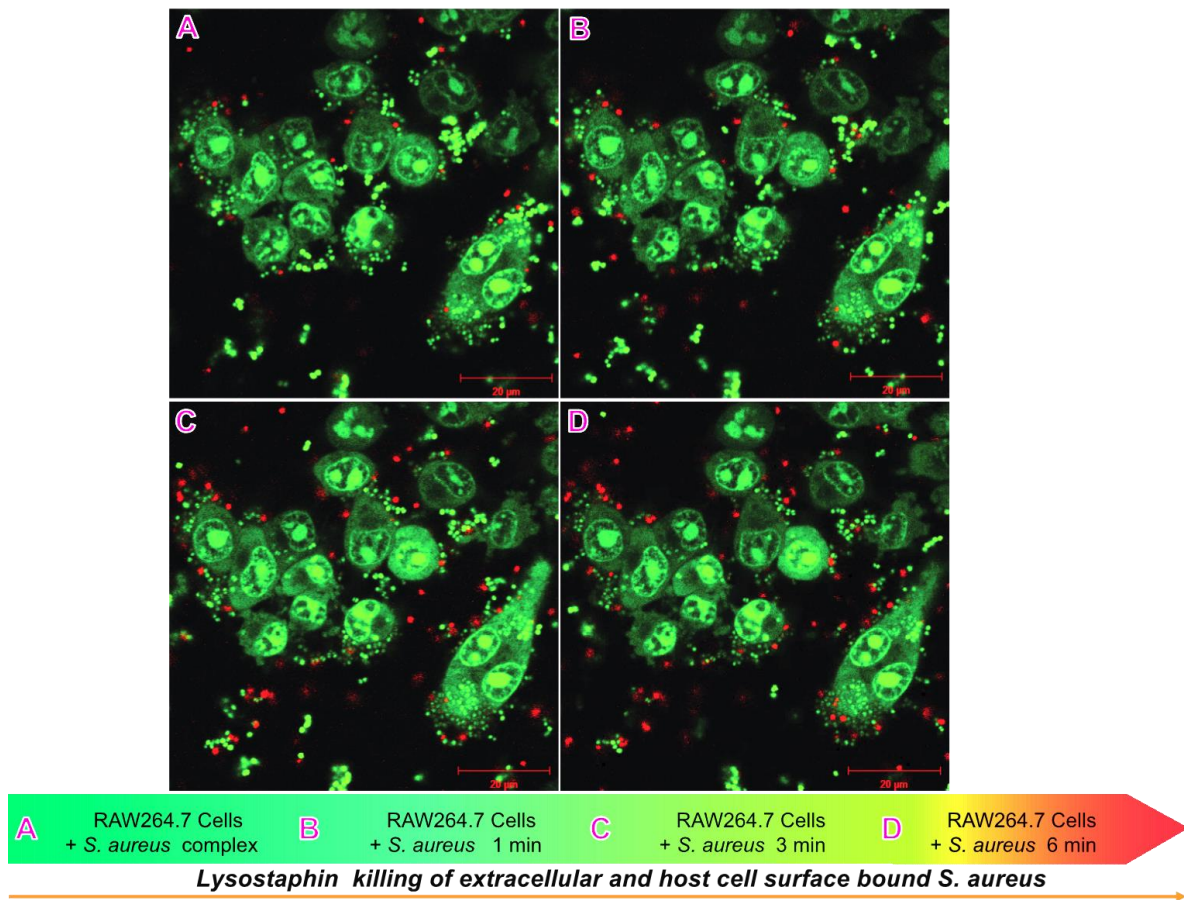

316

317 FIG S14 Snapshot of video V2 showing lysostaphin-mediated killing of extracellular *S. aureus* infected  
 318 into RAW264.7 cells. The representative images were adapted from the supplementary video V2 at time  
 319 points (A) 0 min, (B) 1 min, (C) 3 min, and (D) 6 min after treatment with lysostaphin. Since the  
 320 lysostaphin kills the *S. aureus* within 180 second by hydrolyzing the polyglycine bridges that cross-  
 321 link glycopeptide chains in the peptidoglycan of the *S. aureus* cell wall; the number of red cells  
 322 increased due to dominant internalization of propidium iodide over SYTO9. Lysostaphin cannot be  
 323 internalized into live host cells passively which suggests that accurate numbers of intracellular bacteria  
 324 can be obtained using EPA.

325

326



## 327 **B. Supplementary video legends**

328

329 **1. Supplementary Video V1** Visualization of the gentamicin-mediated killing of extracellular and host  
330 cell surface-attached *S. aureus* for 1 h after 30-min invasion of *S. aureus* and phagocytosis by host cells.  
331 After 30 min of infection of *S. aureus* into RAW264.7 cells, the extracellular medium was removed to  
332 eliminate excess *S. aureus*, and the host-pathogen mixture was washed twice with PBS. Then, 1 ml of fresh  
333 DMEM with 840  $\mu$ M gentamicin was added to the host-pathogen mixture. The gentamicin-mediated  
334 killing was monitored for 1 h using time-lapse acquisition of images every 2 seconds (1800 images).  
335 Despite the removal of excess bacteria and washing, a significant number of *S. aureus* cells remained  
336 adhered into the confocal disc. The time-dependent monitoring of gentamicin killing demonstrated that  
337 the remaining adhered *S. aureus* cells continue to be internalized during the gentamicin killing. These  
338 results suggest that the gentamicin killing assay can confound the accurate counting of internalized bacteria.  
339 Accordingly, it is possible that the virulence potential for a pathogen and the efficacy of newly discovered  
340 antibiotics can be miscalculated when the GPA is applied.

341

342 **2. Supplementary Video V2** Visualization of the lysostaphin-mediated instantaneous killing of  
343 extracellular and host cell surface-bound *S. aureus*. After 30 min of infection into RAW264.7 cells,  
344 extracellular *S. aureus* bacteria were removed by washing, and the host-pathogen mixture was treated with  
345 2 units of lysostaphin in DMEM. The lysostaphin killing was monitored for 10 min using time-lapse  
346 acquisition of images every 2 seconds. It is noteworthy that the green fluorescence in the RAW264.7 cells  
347 (representing the internalized *S. aureus* cells) did not change during lysostaphin killing. Therefore, EPA  
348 provides a viable alternative to the GPA, both for the precise enumeration of internalized *S. aureus* and for  
349 measuring the kinetics of bacterial invasion, virulence and in the determination of efficacy of newly  
350 discovered antibacterial drugs.

351

352

353 **C. References**

- 354 1. Woiwode U, Sievers-Engler A, Lammerhofer M. 2016. Preparation of fluorescent labeled  
355 gentamicin as biological tracer and its characterization by liquid chromatography and high  
356 resolution mass spectrometry. *J Pharm Biomed Anal* 121:307-315.
- 357 2. Bastos MD, Coutinho BG, Coelho ML. 2010. Lysostaphin: A staphylococcal bacteriolysin with  
358 potential clinical applications. *Pharmaceuticals (Basel)* 3:1139-1161.
- 359
